# Supplementary material for: Biallelic TANGO1 mutations cause a novel syndromal disease due to hampered cellular collagen secretion
Source: eLife. 2020 Feb 26;9:e51319. doi: 10.7554/eLife.51319 (PMC7062462; doi:10.7554/eLife.51319)
Supplement: Supplementary file 1. — Shown are the 10 variants found to be homozygous in all affected children and heterozygous in both parents. [file elife-51319-supp1.xlsx]

## Sheet: Supplemental Table 1. 
	List of homozygous variants shared among the four affected brothers.
	Chromosome	Genomic position	cDNA	Protein	Gene	Variant type	Known	Within shared homozygous interval?	Info (gnomAD; splicing)	Entrez gene summary	OMIM phenotypes	Conclusion
	1	24294362A>T	NM_054016.3(SRSF10):c.*3270T>A	/	SRSF10 (serine and arginine rich splicing factor 10)	3' UTR	No	No	/	This gene product is a member of the serine-arginine (SR) family of proteins, which are involved in constitutive and regulated RNA splicing. Members of this family are characterized by N-terminal RNP1 and RNP2 motifs, which are required for binding to RNA, and multiple C-terminal SR/RS repeats, which are important in mediating association with other cellular proteins. This protein interacts with …	/	No clear evidence for effects of the variant on mRNA or protein structure or function. No obvious link between protein function and phenotype of our patients.
	1	215963280T>C	NM_206933.2(USH2A):c.10182+121A>G	/	USH2A (usherin)	Intronic variation	No	Yes	/	This gene encodes a protein that contains laminin EGF motifs, a pentaxin domain, and many fibronectin type III motifs. The protein is found in the basement membrane, and may be important in development and homeostasis of the inner ear and retina.Mutations within this gene have been associated with Usher syndrome type IIa and retinitis pigmentosa. Multiple transcript variants encoding different is…	Gene associated with Retinitis pigmentosa 39 (MIM# 613809) and Usher syndrome, type 2A (MIM# 276901)	No clear evidence for effects of the variant onmRNA or protein structure or function. No obvious link between protein function and all phenotypic aspects of our patients.
	1	222822182A>G	NM_001324062.1(MIA3):c.3621A>G	p.Arg1207Arg	MIA3 (TANGO1) (MIA SH3 domain ER export factor 3)	Synonymous	No	Yes	Increased possibility of new splice donor site within exon 8 Potential disruption of an exon splice enhancer recognized by SC35	/	/	Disease-causing mutation.
	1	223946945C>T	NM_001748.4(CAPN2):c.1318-27C>T	/	CAPN2 (calpain 2)	Intronic variation	rs114318533	Yes	Allele frequency: 0.005991 7 homozygous carriers in gnomAD	The calpains, calcium-activated neutral proteases, are nonlysosomal, intracellular cysteine proteases. The mammalian calpains include ubiquitous, stomach-specific, and muscle-specific proteins. The ubiquitous enzymes consist of heterodimers with distinct large, catalytic subunits associated with a common small, regulatory subunit. This gene encodes the large subunit of the ubiquitous enzyme, calp…	/	7 homozygous carriers in gnomAD make it very unlikely for the variant to cause such a severe syndromal phenoytpe. No obvious link between protein function and phenotype of our patients.
	1	225458508A>G	NM_001373.1(DNAH14):c.7593A>G	p.Lys2531Lys	DNAH14 (dynein axonemal heavy chain 14)	Synonymous	rs200968726	Yes	Allele frequency: 0.0006599 0 homozygous carriers in gnomAD Increased possibility of new splice acceptor site within exon 50 Emergence of binding site for SRp40	Dyneins are microtubule-associated motor protein complexes composed of several heavy, light, and intermediate chains. Two major classes of dyneins, axonemal and cytoplasmic, have been identified. DNAH14 is an axonemal dynein heavy chain (DHC)	/	Our patients show no similarity to patients with defects in other dynein genes such as primary ciliary diskenesia (DNAH5, DNAH1), or laterality defect (DNAH9). There is no phenotypic aspect in our patients that an impaired TANGO1 function could not explain.
	1	226488924A>G	NM_173083.3(LIN9):c.80-18T>C	/	LIN9 (lin-9 DREAM MuvB core complex component)	Intronic variation	rs41305548	Yes	Allele frequency: 0.006576 15 homozygous carriers in gnomAD	This gene encodes a tumor suppressor protein that inhibits DNA synthesis and oncogenic transformation through association with the retinoblastoma 1 protein. The encoded protein also interacts with a complex of other cell cycle regulators to repress cell cycle-dependent gene expression in non-dividing cells. Alternatively spliced transcript variants encoding multiple isoforms have been observed fo…	/	15 homozygous carriers in gnomAD make it very unlikely for the variant to cause such a severe syndromal phenoytpe. No obvious link between protein function and phenotype of our patients.
	1	228560027G>A	NM_001271223.2(OBSCN):c.24419G>A	p.Gly8140Glu	OBSCN (obscurin, cytoskeletal calmodulin and titin-interacting RhoGEF)	Missense	rs1432833853	Yes	Allele frequency: 0.00001053 0 homozygous carriers in gnomAD	The obscurin gene spans more than 150 kb, contains over 80 exons and encodes a protein of approximately 720 kDa. The encoded protein contains 68 Ig domains, 2 fibronectin domains, 1 calcium/calmodulin-binding domain, 1 RhoGEF domain with an associated PH domain, and 2 serine-threonine kinase domains. This protein belongs to the family of giant sacromeric signaling proteins that includes titin and…	/	No obvious link between protein function and phenotype of our patients. We have not observed any muscular defects in our patients.
	20	29646153C>G	/	/	/	Intergenic	rs6057413	No	/	/	/	No clear evidence for effects of the variant on mRNA or protein structure or function.
	20	29653358G>A	/	/	/	Intergenic	rs6119141	No	/	/	/	No clear evidence for effects of the variant on mRNA or protein structure or function.
	21	10707182C>T	/	/	/	Intergenic	rs62219173	No	/	/	/	No clear evidence for effects of the variant on mRNA or protein structure or function.
